# Supplementary material
Source: PubMed Central journal article supplement (PMC7457231)

**a**

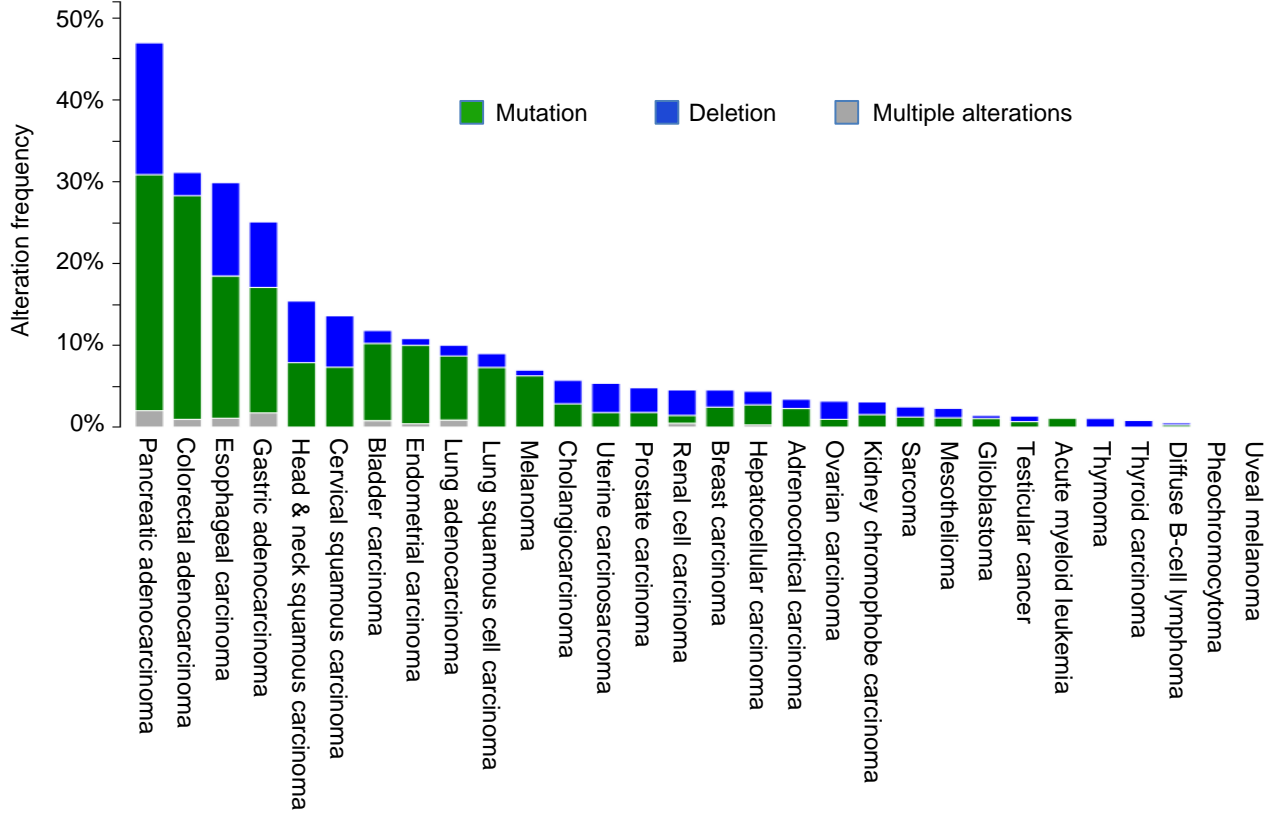

**b**

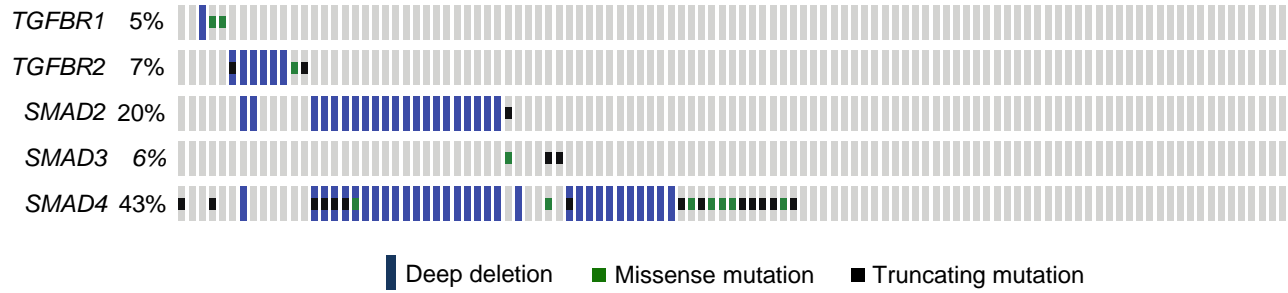

Supplement: NIHMS1618375-supplement-1.pdf [file NIHMS1618375-supplement-1.pdf]
